# Supplementary material for: Halotolerant Marine Rhizosphere-Competent Actinobacteria Promote Salicornia bigelovii Growth and Seed Production Using Seawater Irrigation
Source: PubMed Central journal article supplement (PMC7145952; doi:10.3389/fmicb.2020.00552), 2020-04-03
Supplement: Data_Sheet_1.pdf [file Data_Sheet_1.pdf]

## Supplementary Data

### Halotolerant marine rhizosphere-competent actinobacteria promote *Salicornia bigelovii* growth and seed production using seawater irrigation

Betty T. Mathew, Yaser Torkey, Amr Amin, Abdel-Hamid I. Mourad, Mutamed M. Ayyash, Ali El-Keblawy, Ali Hilal-Alnaqbi, Synan F. AbuQamar\* and Khaled A. El-Tarabily\*

\* **Correspondence:**

Prof. Synan AbuQamar: [sabuqamar@uaeu.ac.ae](mailto:sabuqamar@uaeu.ac.ae)

Prof. Khaled El-Tarabily: [ktarabily@uaeu.ac.ae](mailto:ktarabily@uaeu.ac.ae)

#### Supplementary Figures

**Figure S1.** *In vitro* growth of selected actinobacteria isolated from *Salicornia bigelovii* rhizosphere. (A) Colonies of SA and NSA isolated from *S. bigelovii* grown on inorganic salt starch agar plates; and (B) selected actinobacterial isolates possessing salinity tolerance. In (A), black arrows represent the SA colonies; whereas red, yellow and green arrows represent the NSA colonies of *Micromonospora*, *Actinoplanes* and *Nocardia* spp., respectively. In (B), actinobacteria #21, #7 and #11, but not #16 (control), were considered halotolerant isolates due to growth and sporulation on inorganic salt starch agar supplemented with 8% NaCl. SA, streptomycete actinobacteria; NSA, non-streptomycete actinobacteria.

**Figure S2.** *In vitro* plant growth promoting characteristics of selected halotolerant actinobacterial isolates. Selected actinobacterial strains isolated from *Salicornia bigelovii* rhizosphere possessing the production of (A) IAA; (B) Put; (C) ACCD and (E) siderophores; and (D) solubilization of P. In (A), addition of Salkowski reagent to cultures grown in inorganic salt starch broth amended with L-tryptophan; and the formation of red color indicated the production of the auxin, IAA. In (B) isolates were tested on Moeller's decarboxylase agar medium amended with L-arginine-monohydrochloride; and the change from yellow to red color of the phenol-red indicated production of the polyamine, Put. In (C) isolates were tested in N-free Dworkin and Foster's salts minimal agar medium amended with ACC; where growth and sporulation indicated the efficiency to utilize ACC and the production of ACCD. In (D), isolates were tested on Pikovskaya's agar medium amended with rock phosphate and bromophenol blue; and production of clear zone surrounding the colony was used as an indicator of P-solubilization. In (E), isolates were tested on chrome azurol S agar plates; and yellow halo surrounding the colony indicates the excretion of siderophores. In (A-E), isolates #21, #7 and #11 were considered as auxin-, polyamine and ACCD-producing isolates, respectively. In (D & E), isolates #21 and #7 were considered as P-solubilizing isolates, whereas #21 was considered as a siderophore-producing isolate. Actinobacterial strain #32 was used as a control isolate. IAA, indole-3-acetic acid; Put, putrescine; ACC, 1-aminocyclopropane-1-carboxylic; ACCD, 1-aminocyclopropane-1-carboxylic deaminase; P, phosphorus.

**Table S1.** Comparison of morphological, cultural and phenotypic characteristics that distinguish auxin-producing isolate #21 from very closely related species *Streptomyces chartreusis*.

**Table S2.** Comparison of morphological, cultural and phenotypic characteristics that distinguish polyamine-producing isolate #7 from very closely related species *Streptomyces tritolerans* and *S. tendae*.

**Table S3.** Comparison of morphological, cultural and phenotypic characteristics that distinguish 1-aminocyclopropane-1-carboxylic deaminase-producing isolate #11 from very closely related species *Streptomyces rochei*, *S. plicatus*, *S. enissocaesilis*, and *S. vinaceusdrappus*.

**Figure S3.** Scree plots representing the eigenvalue of variance accounted for each principal component in (A) shoot and (B) root. *S. bigelovii* seedlings were grown in an evaporative-cooled greenhouse and maintained at 25±2°C.

**Table S4.** Pearson correlation coefficient ( $n=8$ ) of 14 variables, including two actinobacterial auxins, six agronomic traits and six plant growth regulators obtained from shoots of *S. bigelovii*. Seedlings were seed- and soil-inoculated with *Streptomyces chartreusis* (*Sc*) grown in an evaporative-cooled greenhouse and maintained at 25±2°C (\*,  $P<0.05$ , \*\*,  $P<0.01$  and \*\*\*,  $P<0.001$ ).

**Table S5.** Pearson correlation coefficient ( $n=8$ ) of 10 variables, including two actinobacterial auxins, two agronomic traits and six plant growth regulators obtained from roots of *S. bigelovii*. Seedlings were seed- and soil-inoculated with *Streptomyces chartreusis* (*Sc*) grown in an evaporative-cooled greenhouse and maintained at 25±2°C (\*,  $P<0.05$ , \*\*,  $P<0.01$  and \*\*\*,  $P<0.001$ ).

**Table S6.** Pearson correlation coefficient ( $n=8$ ) of 15 variables, including three actinobacterial polyamines, six agronomic traits and six plant growth regulators obtained from shoots of *S. bigelovii*. Seedlings were seed- and soil-inoculated with *Streptomyces tritolerans* (*St*) grown in an evaporative-cooled greenhouse and maintained at 25±2°C (\*,  $P<0.05$ , \*\*,  $P<0.01$  and \*\*\*,  $P<0.001$ ).

**Table S7.** Pearson correlation coefficient ( $n=8$ ) of 11 variables, including three actinobacterial polyamines, two agronomic traits and six plant growth regulators obtained from roots of *S. bigelovii*. Seedlings were seed- and soil-inoculated with *Streptomyces tritolerans* (*St*) grown in an evaporative-cooled greenhouse and maintained at 25±2°C (\*,  $P<0.05$ , \*\*,  $P<0.01$  and \*\*\*,  $P<0.001$ ).

**Table S8.** Pearson correlation coefficient ( $n=8$ ) of 13 variables, including the actinobacterial 1-aminocyclopropane-1-carboxylic deaminase, six agronomic traits and six plant growth regulators obtained from shoots of *S. bigelovii*. Seedlings were seed- and soil-inoculated with *Streptomyces rochei* (*Sr*) grown in an evaporative-cooled greenhouse and maintained at 25±2°C (\*,  $P<0.05$ , \*\*,  $P<0.01$  and \*\*\*,  $P<0.001$ ).

**Table S9.** Pearson correlation coefficient ( $n=8$ ) of nine variables, including the actinobacterial 1-aminocyclopropane-1-carboxylic deaminase, two agronomic traits and six plant growth regulators obtained from roots of *S. bigelovii*. Seedlings were seed- and soil-inoculated with *Streptomyces rochei* (*Sr*) grown in an evaporative-cooled greenhouse and maintained at 25±2°C (\*,  $P<0.05$ , \*\*,  $P<0.01$  and \*\*\*,  $P<0.001$ ).

**Table S10.** Pearson correlation coefficient ( $n=8$ ) of 18 variables, including actinobacterial auxins, polyamines and 1-aminocyclopropane-1-carboxylic deaminase, six agronomic traits and six plant growth regulators obtained from shoots of *S. bigelovii*. Seedlings were seed- and soil-inoculated with *S. chartreusis*, *S. tritolerans* and *S. rochei* (*Sc/St/Sr*) grown in an evaporative-cooled greenhouse and maintained at 25±2°C (\*,  $P<0.05$ , \*\*,  $P<0.01$  and \*\*\*,  $P<0.001$ ).

**Table S11.** Pearson correlation coefficient ( $n=8$ ) of 14 variables, including actinobacterial auxins, polyamines and 1-aminocyclopropane-1-carboxylic deaminase, two agronomic traits and six plant growth regulators obtained from roots of *S. bigelovii*. Seedlings were seed- and soil-inoculated with *S. chartreusis*, *S. tritolerans* and *S. rochei* (*Sc/St/Sr*) grown in an evaporative-cooled greenhouse and maintained at  $25 \pm 2^\circ\text{C}$  (\*,  $P<0.05$ , \*\*,  $P<0.01$  and \*\*\*,  $P<0.001$ ).

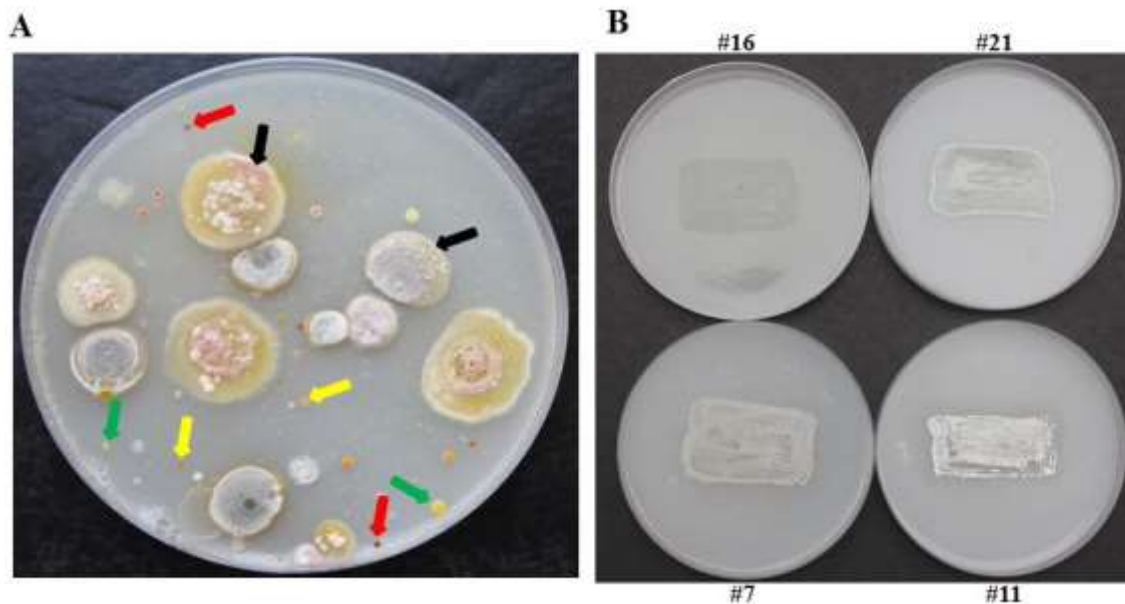

**Figure S1.** *In vitro* growth of selected actinobacteria isolated from *Salicornia bigelovii* rhizosphere. (A) Colonies of SA and NSA isolated from *S. bigelovii* grown on inorganic salt starch agar plates; and (B) selected actinobacterial isolates possessing salinity tolerance. In (A), black arrows represent the SA colonies; whereas red, yellow and green arrows represent the NSA colonies of *Micromonospora*, *Actinoplanes* and *Nocardia* spp., respectively. In (B), actinobacteria #21, #7 and #11, but not #16 (control), were considered halotolerant isolates due to growth and sporulation on inorganic salt starch agar supplemented with 8% NaCl. SA, streptomycete actinobacteria; NSA, non-streptomycete actinobacteria.

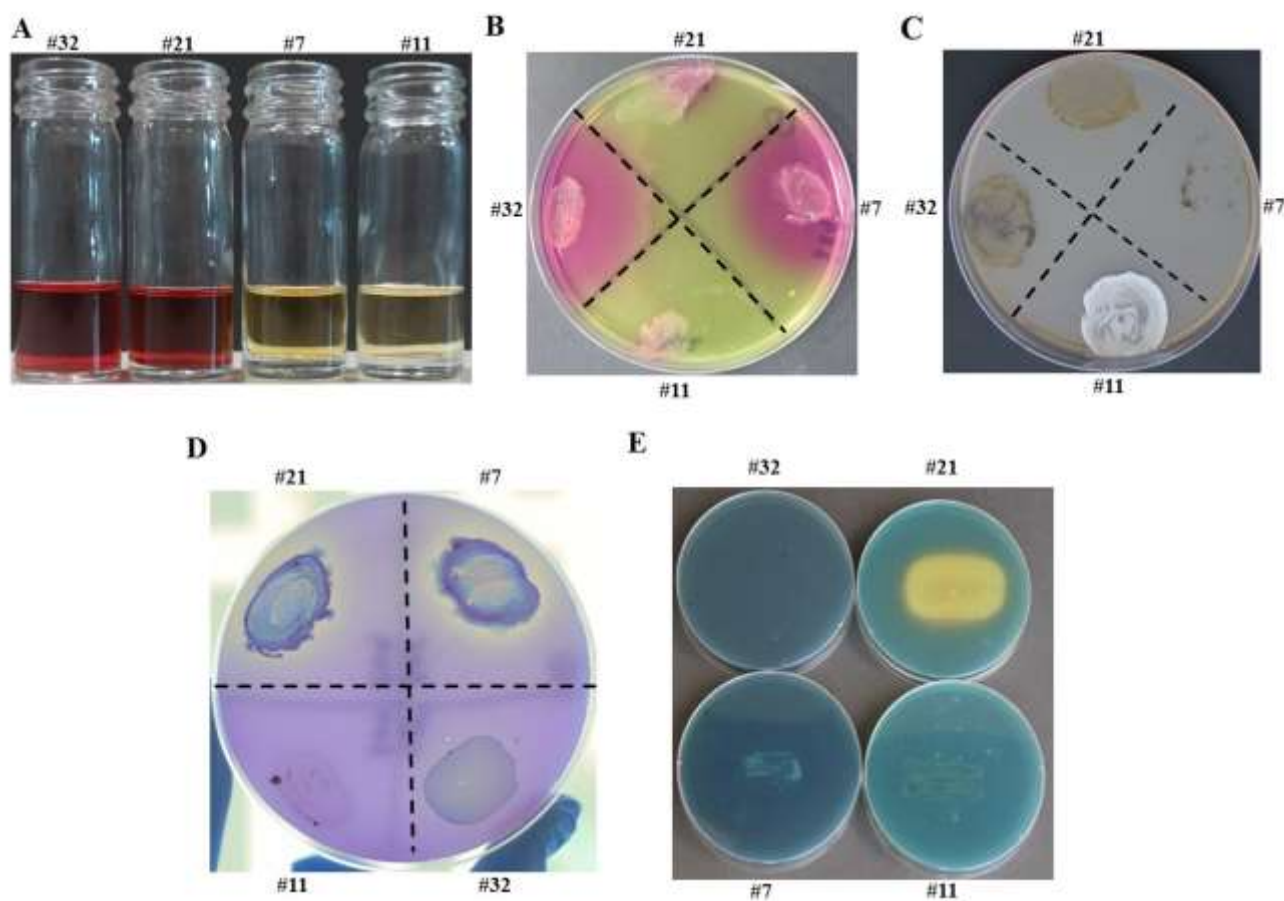

**Figure S2.** *In vitro* plant growth promoting characteristics of selected halotolerant actinobacterial isolates. Selected actinobacterial strains isolated from *Salicornia bigelovii* rhizosphere possessing the production of (A) IAA; (B) Put; (C) ACCD and (E) siderophores; and (D) solubilization of P. In (A), addition of Salkowski reagent to cultures grown in inorganic salt starch broth amended with L-tryptophan; and the formation of red color indicated the production of the auxin, IAA. In (B) isolates were tested on Moeller's decarboxylase agar medium amended with L-arginine-monohydrochloride; and the change from yellow to red color of the phenol-red indicated production of the polyamine, Put. In (C) isolates were tested in N-free Dworkin and Foster's salts minimal agar medium amended with ACC; where growth and sporulation indicated the efficiency to utilize ACC and the production of ACCD. In (D), isolates were tested on Pikovskaya's agar medium amended with rock phosphate and bromophenol blue; and production of clear zone surrounding the colony was used as an indicator of P-solubilization. In (E), isolates were tested on chrome azurol S agar plates; and yellow halo surrounding the colony indicates the excretion of siderophores. In (A-E), isolates #21, #7 and #11 were considered as auxin-, polyamine and ACCD-producing isolates, respectively. In (D & E), isolates #21 and #7 were considered as P-solubilizing isolates, whereas #21 was considered as a siderophore-producing isolate. Actinobacterial strain #32 was used as a control isolate. IAA, indole-3-acetic acid; Put, putrescine; ACC, 1-aminocyclopropane-1-carboxylic; ACCD, 1-aminocyclopropane-1-carboxylic deaminase; P, phosphorus.

**Table S1.** Comparison of morphological, cultural and phenotypic characteristics that distinguish auxin-producing isolate #21 from very closely related species *Streptomyces chartreusis*.

| <b>Characteristics</b>                                            | <b>Isolate #21</b>                                | <b><i>S. chartreusis</i></b>                      |
|-------------------------------------------------------------------|---------------------------------------------------|---------------------------------------------------|
| <b>Morphological</b>                                              |                                                   |                                                   |
| Spore chain                                                       | Spirales (open spiral) having 10-25 spores/chain. | Spirales (open spiral) having 10-50 spores/chain. |
| Spore surface                                                     | Spiny                                             | Spiny                                             |
| <b>Cultural</b>                                                   |                                                   |                                                   |
| <b>ISP3</b>                                                       |                                                   |                                                   |
| Aerial mass color                                                 | Powdery blue-green                                | Powdery blue-green                                |
| Substrate mycelium color                                          | Yellowish white                                   | Yellowish white                                   |
| Production of soluble pigment                                     | No distinctive pigments                           | No distinctive pigments                           |
| <b>Phenotypic</b>                                                 |                                                   |                                                   |
| Growth on carbon sources                                          |                                                   |                                                   |
| Xylose                                                            | +                                                 | +                                                 |
| Arabinose                                                         | +                                                 | +                                                 |
| Glucose                                                           | +                                                 | +                                                 |
| Fructose                                                          | +                                                 | +                                                 |
| Rhamnose                                                          | +                                                 | +                                                 |
| Iso-inositol                                                      | +                                                 | +                                                 |
| Mannitol                                                          | +                                                 | +                                                 |
| Sucrose                                                           | +                                                 | +                                                 |
| Raffinose                                                         | -                                                 | -                                                 |
| Melanin production in                                             |                                                   |                                                   |
| Peptone yeast iron agar                                           | +                                                 | +                                                 |
| Tyrosine agar                                                     | -                                                 | -                                                 |
| Citrate utilization                                               | +                                                 | +                                                 |
| Nitrate reduction                                                 | +                                                 | +                                                 |
| Hydrolysis of                                                     |                                                   |                                                   |
| Starch                                                            | +                                                 | +                                                 |
| Gelatin                                                           | +                                                 | +                                                 |
| Casein                                                            | +                                                 | +                                                 |
| Production of hydrogen sulfide                                    | -                                                 | -                                                 |
| <b>Reference</b>                                                  | <b>This study</b>                                 | <b>Leach et al. (1953)</b>                        |
| +, growth or positive reaction; -, no growth or negative reaction |                                                   |                                                   |

**Table S2.** Comparison of morphological, cultural and phenotypic characteristics that distinguish polyamine-producing isolate #7 from very closely related species *Streptomyces tritolerans* and *S. tendae*.

| <b>Characteristics</b>                                             | <b>Isolate #7</b>                           | <b><i>S. tritolerans</i></b>                | <b><i>S. tendae</i></b> |
|--------------------------------------------------------------------|---------------------------------------------|---------------------------------------------|-------------------------|
| <b>Morphological</b>                                               |                                             |                                             |                         |
| Spore chains                                                       | Straight to flexuous<br>(Rectus-flexibilis) | Straight to flexuous<br>(Rectus-flexibilis) | Retinaculiperti-spirals |
| Spore surface                                                      | Smooth                                      | Smooth                                      | warty                   |
| <b>Cultural</b>                                                    |                                             |                                             |                         |
| <b>ISP3</b>                                                        |                                             |                                             |                         |
| Aerial mycelium color                                              | Gray                                        | Gray                                        | Gray                    |
| Substrate mycelium color                                           | Dark yellow                                 | Dark yellow                                 | Yellow                  |
| Diffusible pigment color                                           | -                                           | -                                           | Yellow                  |
| Growth at 7% NaCl                                                  | +                                           | +                                           | -                       |
| <b>Phenotypic</b>                                                  |                                             |                                             |                         |
| Growth on sole carbon sources                                      |                                             |                                             |                         |
| Glucose                                                            | +                                           | +                                           | +                       |
| Rhamnose                                                           | -                                           | -                                           | +                       |
| Sucrose                                                            | +                                           | +                                           | +                       |
| Mannitol                                                           | +                                           | +                                           | +                       |
| Meso-inositol                                                      | -                                           | -                                           | +                       |
| Raffinose                                                          | -                                           | -                                           | -                       |
| Production of melanin pigments on                                  |                                             |                                             |                         |
| Peptone-yeast extract-iron agar                                    | +                                           | +                                           | -                       |
| Tyrosine agar                                                      | +                                           | +                                           | -                       |
| Hydrolysis of                                                      |                                             |                                             |                         |
| Casein                                                             | +                                           | +                                           | -                       |
| Cellulose                                                          | +                                           | +                                           | -                       |
| Pectin                                                             | -                                           | -                                           | +                       |
| Starch                                                             | +                                           | +                                           | +                       |
| Growth on sole nitrogen sources                                    |                                             |                                             |                         |
| L- phenylalanine                                                   | +                                           | +                                           | +                       |
| L-histidine                                                        | -                                           | -                                           | -                       |
| <b>Reference</b>                                                   | This study                                  | Syed et al. (2007)                          | Ettliger et al. (1958)  |
| +, growth or positive reaction; -, no growth or negative reaction. |                                             |                                             |                         |

**Table S3.** Comparison of morphological, cultural and phenotypic characteristics that distinguish 1-aminocyclopropane-1-carboxylic deaminase-producing isolate #11 from very closely related species *Streptomyces rochei*, *S. plicatus*, *S. enissocaesilis*, and *S. vinaceusdrappus*.

| Characteristic                                                    | Isolate #11                              | <i>S. rochei</i>                         | <i>S. plicatus</i>          | <i>S. enissocaesilis</i>   | <i>S. vinaceusdrappus</i> |
|-------------------------------------------------------------------|------------------------------------------|------------------------------------------|-----------------------------|----------------------------|---------------------------|
| <b>Morphological</b>                                              |                                          |                                          |                             |                            |                           |
| Spore chain                                                       | Straight to flexuous (Rectus-flexibilis) | Straight to flexuous (Rectus-flexibilis) | Retinaculum-apertum         | Spiral                     | Spiral                    |
| Spore surface                                                     | Smooth                                   | Smooth                                   | Smooth                      | Smooth                     | Smooth                    |
| <b>Cultural</b>                                                   |                                          |                                          |                             |                            |                           |
| <b>ISP3</b>                                                       |                                          |                                          |                             |                            |                           |
| Aerial mass color                                                 | Light grayish yellow                     | Grayish yellow                           | Light brownish gray         | Poorly developed           | Grayish reddish brown     |
| Substrate mycelium color                                          | Pale grayish yellow                      | Pale grayish yellow                      | Pale grayish yellow         | Brown                      | Yellow                    |
| Diffusible pigment                                                | -                                        | -                                        | -                           | Brown                      | -                         |
| <b>ISP4</b>                                                       |                                          |                                          |                             |                            |                           |
| Aerial mass color                                                 | Dark grayish yellow                      | Dark grayish yellow                      | Light grayish reddish brown | - or poorly developed      | Grayish yellowish pink    |
| Substrate mycelium color                                          | Pale grayish yellow                      | Grayish yellow                           | Yellowish brown             | Colorless                  | Yellowish brown           |
| Diffusible pigment                                                | -                                        | -                                        | -                           | -                          | -                         |
| <b>ISP5</b>                                                       |                                          |                                          |                             |                            |                           |
| Aerial mass color                                                 | Light grayish yellow                     | Light grayish yellow                     | Light grayish reddish brown | Absent or poorly developed | Grayish reddish brown     |
| Substrate mycelium color                                          | Grayish yellow                           | Pale grayish yellow                      | Dark grayish brown          | Black grayish brown        | Yellowish brown           |
| Diffusible pigment                                                | -                                        | -                                        | -                           | -                          | -                         |
| <b>Phenotypic</b>                                                 |                                          |                                          |                             |                            |                           |
| Growth on sole carbon sources                                     |                                          |                                          |                             |                            |                           |
| Glucose                                                           | +                                        | +                                        | +                           | +                          | +                         |
| Arabinose                                                         | +                                        | +                                        | +                           | +                          | +                         |
| Xylose                                                            | +                                        | +                                        | +                           | +                          | +                         |
| Mannitol                                                          | +                                        | +                                        | +                           | +                          | +                         |
| Sucrose                                                           | -                                        | -                                        | -                           | -                          | +                         |
| Rhamnose                                                          | +                                        | +                                        | +                           | -                          | +                         |
| Raffinose                                                         | -                                        | -                                        | -                           | -                          | +                         |
| Fructose                                                          | +                                        | +                                        | +                           | +                          | +                         |
| Production of melanin pigments on                                 |                                          |                                          |                             |                            |                           |
| Peptone-yeast extract-iron agar                                   | -                                        | -                                        | -                           | -                          | -                         |
| Tyrosine agar                                                     | -                                        | -                                        | -                           | -                          | -                         |
| Production of hydrogen sulfide                                    |                                          |                                          |                             |                            |                           |
| Nitrate reduction                                                 | -                                        | -                                        | -                           | -                          | -                         |
| Hydrolysis of                                                     |                                          |                                          |                             |                            |                           |
| Starch                                                            | +                                        | +                                        | +                           | +                          | +                         |
| Gelatin                                                           | +                                        | +                                        | +                           | +                          | +                         |
| Casein                                                            | -                                        | -                                        | -                           | -                          | -                         |
| <b>Reference</b>                                                  | This study                               | Kämpfer (2012)                           | Kämpfer (2012)              | Kämpfer (2012)             | Kämpfer (2012)            |
| +, growth or positive reaction; -, no growth or negative reaction |                                          |                                          |                             |                            |                           |



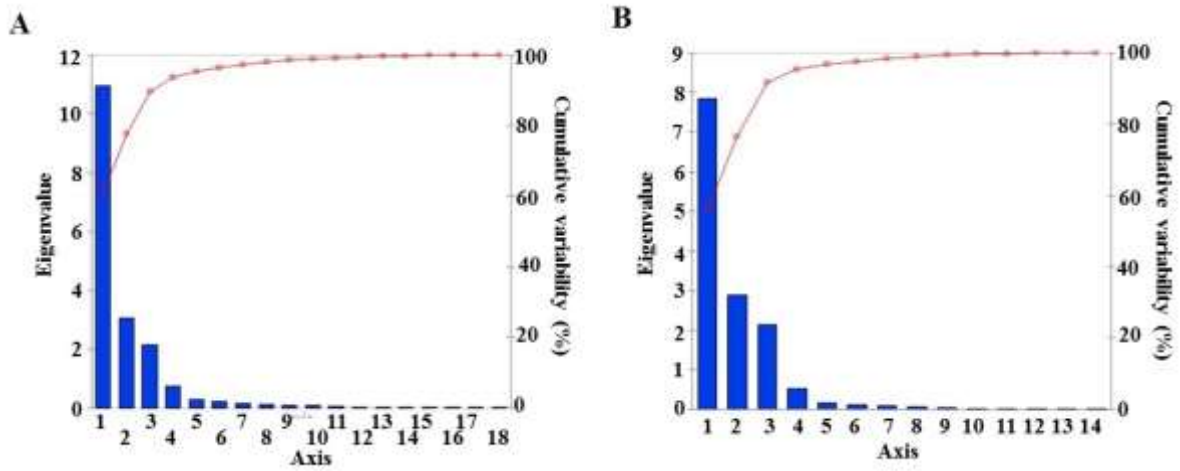

**Figure S3.** Scree plots representing the eigenvalue of variance accounted for each principal component in **(A)** shoot and **(B)** root. *S. bigelovii* seedlings were grown in an evaporative-cooled greenhouse and maintained at  $25\pm 2^{\circ}\text{C}$ .

**Table S4.** Pearson correlation coefficient ( $n=8$ ) of 14 variables, including two actinobacterial auxins, six agronomic traits and six plant growth regulators obtained from shoots of *S. bigelovii*. Seedlings were seed- and soil-inoculated with *Streptomyces chartreusis* (*Sc*) grown in an evaporative-cooled greenhouse and maintained at  $25\pm 2^\circ\text{C}$  (\*,  $P<0.05$ , \*\*,  $P<0.01$  and \*\*\*,  $P<0.001$ ).

| Parameter |      | <i>Sc</i>    |              | Shoot        |              |             |             |              |              |              |        |       |        |        |     |  |
|-----------|------|--------------|--------------|--------------|--------------|-------------|-------------|--------------|--------------|--------------|--------|-------|--------|--------|-----|--|
|           |      | IAA          | IPYA         | L            | DW           | SDW         | Chla        | Chlb         | Car          | IAA          | IPYA   | Put   | Spd    | Spm    | ACC |  |
| <i>Sc</i> | IAA  | 1            |              |              |              |             |             |              |              |              |        |       |        |        |     |  |
|           | IPYA | 0.996<br>*** | 1            |              |              |             |             |              |              |              |        |       |        |        |     |  |
| Shoot     | L    | 0.842<br>*** | 0.842<br>*** | 1            |              |             |             |              |              |              |        |       |        |        |     |  |
|           | DW   | 0.793<br>*** | 0.778<br>*** | 0.747<br>*** | 1            |             |             |              |              |              |        |       |        |        |     |  |
|           | SDW  | 0.891<br>*** | 0.896<br>*** | 0.693<br>**  | 0.830<br>*** | 1           |             |              |              |              |        |       |        |        |     |  |
|           | Chla | 0.675<br>**  | 0.693<br>**  | 0.561<br>*   | 0.597<br>*   | 0.675<br>** | 1           |              |              |              |        |       |        |        |     |  |
|           | Chlb | 0.870<br>*** | 0.868<br>*** | 0.805<br>*** | 0.745<br>*** | 0.670<br>** | 0.536       | 1            |              |              |        |       |        |        |     |  |
|           | Car  | 0.797<br>*** | 0.806<br>*** | 0.810<br>*** | 0.633<br>**  | 0.701<br>** | 0.636<br>** | 0.757<br>*** | 1            |              |        |       |        |        |     |  |
|           | IAA  | 0.829<br>*** | 0.835<br>*** | 0.760<br>*** | 0.685<br>**  | 0.737<br>** | 0.688<br>** | 0.866<br>*** | 0.773<br>*** | 1            |        |       |        |        |     |  |
|           | IPYA | 0.835<br>*** | 0.849<br>*** | 0.853<br>*** | 0.581<br>*   | 0.690<br>*  | 0.588<br>*  | 0.816<br>*** | 0.886<br>*** | 0.751<br>*** | 1      |       |        |        |     |  |
|           | Put  | 0.262        | 0.290        | 0.496        | 0.388        | 0.154       | 0.392       | 0.497        | 0.335        | 0.359        | 0.496  | 1     |        |        |     |  |
|           | Spd  | 0.313        | 0.309        | 0.274        | 0.417        | 0.263       | 0.104       | 0.234        | 0.027        | 0.049        | -0.048 | 0.148 | 1      |        |     |  |
|           | Spm  | 0.317        | 0.335        | 0.269        | 0.171        | 0.191       | 0.346       | 0.380        | 0.689<br>**  | 0.335        | 0.481  | 0.208 | -0.090 | 1      |     |  |
|           | ACC  | 0.040        | 0.010        | 0.254        | 0.294        | 0.014       | -0.112      | 0.259        | 0.021        | 0.199        | 0.099  | 0.335 | -0.043 | -0.202 | 1   |  |

**Table S5.** Pearson correlation coefficient ( $n=8$ ) of 10 variables, including two actinobacterial auxins, two agronomic traits and six plant growth regulators obtained from roots of *S. bigelovii*. Seedlings were seed- and soil-inoculated with *Streptomyces chartreusis* (*Sc*) grown in an evaporative-cooled greenhouse and maintained at  $25\pm 2^\circ\text{C}$  (\*,  $P<0.05$ , \*\*,  $P<0.01$  and \*\*\*,  $P<0.001$ ).

| Parameter |      | <i>Sc</i>    |              | Root         |             |              |             |        |        |        |     |  |
|-----------|------|--------------|--------------|--------------|-------------|--------------|-------------|--------|--------|--------|-----|--|
|           |      | IAA          | IPYA         | L            | DW          | IAA          | IPYA        | Put    | Spd    | Spm    | ACC |  |
| <i>Sc</i> | IAA  | 1            |              |              |             |              |             |        |        |        |     |  |
|           | IPYA | 0.996<br>*** | 1            |              |             |              |             |        |        |        |     |  |
| Root      | L    | 0.693<br>**  | 0.715<br>**  | 1            |             |              |             |        |        |        |     |  |
|           | DW   | 0.816<br>*** | 0.847<br>*** | 0.766<br>*** | 1           |              |             |        |        |        |     |  |
|           | IAA  | 0.715<br>**  | 0.703<br>**  | 0.651<br>**  | 0.714<br>** | 1            |             |        |        |        |     |  |
|           | IPYA | 0.866<br>*** | 0.852<br>*** | 0.465        | 0.713<br>** | 0.612<br>*   | 1           |        |        |        |     |  |
|           | Put  | 0.144        | 0.182        | 0.484        | 0.473       | 0.221        | 0.043       | 1      |        |        |     |  |
|           | Spd  | -0.402       | -0.425       | -0.013       | -0.387      | 0.041        | -0.538<br>* | -0.083 | 1      |        |     |  |
|           | Spm  | 0.344        | 0.338        | 0.516<br>*   | 0.452       | 0.743<br>*** | 0.152       | 0.029  | 0.349  | 1      |     |  |
|           | ACC  | -0.154       | -0.141       | -0.132       | -0.118      | -0.391       | -0.066      | -0.245 | -0.310 | -0.323 | 1   |  |

**Table S6.** Pearson correlation coefficient ( $n=8$ ) of 15 variables, including three actinobacterial polyamines, six agronomic traits and six plant growth regulators obtained from shoots of *S. bigelovii*. Seedlings were seed- and soil-inoculated with *Streptomyces tritolerans* (*St*) grown in an evaporative-cooled greenhouse and maintained at  $25\pm 2^\circ\text{C}$  (\*,  $P<0.05$ , \*\*,  $P<0.01$  and \*\*\*,  $P<0.001$ ).

| Parameter |      | <i>St</i>    |              |              | Shoot        |              |              |              |              |               |              |              |              |              |        |     |
|-----------|------|--------------|--------------|--------------|--------------|--------------|--------------|--------------|--------------|---------------|--------------|--------------|--------------|--------------|--------|-----|
|           |      | Put          | Spd          | Spm          | L            | DW           | SDW          | Chla         | Chlb         | Car           | IAA          | IPYA         | Put          | Spd          | Spm    | ACC |
| <i>St</i> | Put  | 1            |              |              |              |              |              |              |              |               |              |              |              |              |        |     |
|           | Spd  | 0.986<br>*** | 1            |              |              |              |              |              |              |               |              |              |              |              |        |     |
|           | Spm  | 0.952<br>*** | 0.934<br>*** | 1            |              |              |              |              |              |               |              |              |              |              |        |     |
| Shoot     | L    | 0.957<br>*** | 0.961<br>*** | 0.919<br>*** | 1            |              |              |              |              |               |              |              |              |              |        |     |
|           | DW   | 0.916<br>*** | 0.896<br>*** | 0.850<br>*** | 0.890<br>*** | 1            |              |              |              |               |              |              |              |              |        |     |
|           | SDW  | 0.944<br>*** | 0.924<br>*** | 0.942<br>*** | 0.921<br>*** | 0.901<br>*** | 1            |              |              |               |              |              |              |              |        |     |
|           | Chla | 0.891<br>*** | 0.884<br>*** | 0.830<br>*** | 0.840<br>*** | 0.825<br>*** | 0.858<br>*** | 1            |              |               |              |              |              |              |        |     |
|           | Chlb | 0.948<br>*** | 0.926<br>*** | 0.930<br>*** | 0.942<br>*** | 0.863<br>*** | 0.934<br>*** | 0.848<br>*** | 1            |               |              |              |              |              |        |     |
|           | Car  | 0.906<br>*** | 0.889<br>*** | 0.911<br>*** | 0.893<br>*** | 0.786<br>*** | 0.917<br>*** | 0.812<br>*** | 0.936<br>*** | 1             |              |              |              |              |        |     |
|           | IAA  | 0.851<br>*** | 0.844<br>*** | 0.757<br>*** | 0.743<br>*** | 0.722<br>**  | 0.781<br>*** | 0.810<br>*** | 0.755<br>*** | 0.767<br>***  | 1            |              |              |              |        |     |
|           | IPYA | 0.789<br>*** | 0.804<br>*** | 0.773<br>*** | 0.794<br>*** | 0.679<br>**  | 0.748<br>*** | 0.670<br>**  | 0.828<br>*** | 0.778<br>***  | 0.529<br>*   | 1            |              |              |        |     |
|           | Put  | 0.977<br>*** | 0.964<br>*** | 0.923<br>*** | 0.961<br>*** | 0.897<br>*** | 0.948<br>*** | 0.888<br>*** | 0.964<br>*** | 0.937<br>***  | 0.804<br>*** | 0.828<br>*** | 1            |              |        |     |
|           | Spd  | 0.976<br>*** | 0.961<br>*** | 0.966<br>*** | 0.960<br>*** | 0.891<br>*** | 0.915<br>*** | 0.856<br>*** | 0.918<br>*** | 0.887<br>r*** | 0.802<br>*** | 0.747<br>*** | 0.941<br>*** | 1            |        |     |
|           | Spm  | 0.943<br>*** | 0.923<br>*** | 0.911<br>*** | 0.895<br>*** | 0.823<br>*** | 0.884<br>*** | 0.850<br>*** | 0.939<br>*** | 0.958<br>***  | 0.828<br>*** | 0.825<br>*** | 0.947<br>*** | 0.918<br>*** | 1      |     |
|           | ACC  | -0.155       | -0.174       | -0.184       | -0.240       | -0.036       | -0.266       | -0.287       | -0.346       | -0.382        | -0.258       | -0.176       | -0.248       | -0.104       | -0.263 | 1   |

**Table S7.** Pearson correlation coefficient ( $n=8$ ) of 11 variables, including three actinobacterial polyamines, two agronomic traits and six plant growth regulators obtained from roots of *S. bigelovii*. Seedlings were seed- and soil-inoculated with *Streptomyces tritolerans* (*St*) grown in an evaporative-cooled greenhouse and maintained at  $25\pm 2^\circ\text{C}$  (\*,  $P<0.05$ , \*\*,  $P<0.01$  and \*\*\*,  $P<0.001$ ).

| Parameter |      | St           |              |              | Root         |              |              |              |              |              |       |     |  |
|-----------|------|--------------|--------------|--------------|--------------|--------------|--------------|--------------|--------------|--------------|-------|-----|--|
|           |      | Put          | Spd          | Spm          | L            | DW           | IAA          | IPYA         | Put          | Spd          | Spm   | ACC |  |
| St        | Put  | 1            |              |              |              |              |              |              |              |              |       |     |  |
|           | Spd  | 0.986<br>*** | 1            |              |              |              |              |              |              |              |       |     |  |
|           | Spm  | 0.952<br>*** | 0.934<br>*** | 1            |              |              |              |              |              |              |       |     |  |
| Root      | L    | 0.922<br>*** | 0.905<br>*** | 0.949<br>*** | 1            |              |              |              |              |              |       |     |  |
|           | DW   | 0.926<br>*** | 0.918<br>*** | 0.948<br>*** | 0.848<br>*** | 1            |              |              |              |              |       |     |  |
|           | IAA  | 0.886<br>*** | 0.890<br>*** | 0.871<br>*** | 0.840<br>*** | 0.879<br>*** | 1            |              |              |              |       |     |  |
|           | IPYA | 0.790<br>*** | 0.843<br>*** | 0.724<br>**  | 0.619<br>*   | 0.818<br>*** | 0.719<br>**  | 1            |              |              |       |     |  |
|           | Put  | 0.977<br>*** | 0.967<br>*** | 0.962<br>*** | 0.929<br>*** | 0.959<br>*** | 0.888<br>*** | 0.787<br>*** | 1            |              |       |     |  |
|           | Spd  | 0.962<br>*** | 0.954<br>*** | 0.925<br>*** | 0.935<br>*** | 0.914<br>*** | 0.897<br>*** | 0.778<br>*** | 0.969<br>*** | 1            |       |     |  |
|           | Spm  | 0.943<br>*** | 0.918<br>*** | 0.915<br>*** | 0.898<br>*** | 0.862<br>*** | 0.900<br>*** | 0.700<br>**  | 0.892<br>*** | 0.917<br>*** | 1     |     |  |
|           | ACC  | 0.247        | 0.209        | 0.192        | 0.241        | 0.095        | 0.163        | 0.006        | 0.210        | 0.168        | 0.312 | 1   |  |

**Table S8.** Pearson correlation coefficient ( $n=8$ ) of 13 variables, including the actinobacterial 1-aminocyclopropane-1-carboxylic deaminase, six agronomic traits and six plant growth regulators obtained from shoots of *S. bigelovii*. Seedlings were seed- and soil-inoculated with *Streptomyces rochei* (*Sr*) grown in an evaporative-cooled greenhouse and maintained at  $25\pm 2^\circ\text{C}$  (\*,  $P<0.05$ , \*\*,  $P<0.01$  and \*\*\*,  $P<0.001$ ).

| Parameter |           | <i>Sr</i> | Shoot         |               |               |               |               |               |               |               |               |        |        |        |
|-----------|-----------|-----------|---------------|---------------|---------------|---------------|---------------|---------------|---------------|---------------|---------------|--------|--------|--------|
|           |           | ACCD      | L             | DW            | SDW           | Chla          | Chlb          | Car           | IAA           | IPYA          | Put           | Spd    | Spm    | ACC    |
| Shoot     | <i>Sr</i> | ACCD      | 1             |               |               |               |               |               |               |               |               |        |        |        |
|           |           | L         | 0.889<br>***  | 1             |               |               |               |               |               |               |               |        |        |        |
|           |           | DW        | 0.978<br>***  | 0.893<br>***  | 1             |               |               |               |               |               |               |        |        |        |
|           |           | SDW       | 0.959<br>***  | 0.827<br>***  | 0.970<br>***  | 1             |               |               |               |               |               |        |        |        |
|           |           | Chla      | 0.726<br>**   | 0.520<br>*    | 0.745<br>***  | 0.724<br>**   | 1             |               |               |               |               |        |        |        |
|           |           | Chlb      | 0.964<br>***  | 0.871<br>***  | 0.915<br>***  | 0.880<br>***  | 0.655<br>**   | 1             |               |               |               |        |        |        |
|           |           | Car       | 0.974<br>***  | 0.845<br>***  | 0.968<br>***  | 0.953<br>***  | 0.729<br>**   | 0.949<br>***  | 1             |               |               |        |        |        |
|           |           | IAA       | 0.943<br>***  | 0.774<br>***  | 0.884<br>***  | 0.908<br>***  | 0.728<br>**   | 0.900<br>***  | 0.922<br>***  | 1             |               |        |        |        |
|           |           | IPYA      | 0.863<br>***  | 0.763<br>***  | 0.830<br>***  | 0.830<br>***  | 0.552<br>*    | 0.888<br>***  | 0.825<br>***  | 0.753<br>***  | 1             |        |        |        |
|           |           | Put       | 0.565<br>*    | 0.607<br>*    | 0.573<br>*    | 0.470         | 0.445         | 0.616<br>*    | 0.568<br>*    | 0.488         | 0.560<br>*    | 1      |        |        |
|           |           | Spd       | -0.088        | 0.158         | -0.063        | -0.213        | -0.171        | -0.051        | -0.128        | -0.178        | -0.171        | 0.222  | 1      |        |
|           |           | Spm       | 0.179         | -0.054        | 0.186         | 0.248         | 0.300         | 0.199         | 0.334         | 0.275         | 0.192         | 0.024  | -0.213 | 1      |
|           |           | ACC       | -0.965<br>*** | -0.820<br>*** | -0.923<br>*** | -0.934<br>*** | -0.753<br>*** | -0.931<br>*** | -0.954<br>*** | -0.956<br>*** | -0.820<br>*** | -0.471 | 0.181  | -0.302 |

**Table S9.** Pearson correlation coefficient ( $n=8$ ) of nine variables, including the the actinobacterial 1-aminocyclopropane-1-carboxylic deaminase, two agronomic traits and six plant growth regulators obtained from roots of *S. bigelovii*. Seedlings were seed- and soil-inoculated with *Streptomyces rochei* (*Sr*) grown in an evaporative-cooled greenhouse and maintained at  $25\pm 2^\circ\text{C}$  (\*,  $P<0.05$ , \*\*,  $P<0.01$  and \*\*\*,  $P<0.001$ ).

| Parameter |      | <i>Sr</i>    | Root         |             |              |             |        |        |        |     |
|-----------|------|--------------|--------------|-------------|--------------|-------------|--------|--------|--------|-----|
|           |      | ACCD         | L            | DW          | IAA          | IPYA        | Put    | Spd    | Spm    | ACC |
| <i>Sr</i> | ACCD | 1            |              |             |              |             |        |        |        |     |
|           | L    | 0.701<br>**  | 1            |             |              |             |        |        |        |     |
| Root      | DW   | 0.848<br>*** | 0.766<br>*** | 1           |              |             |        |        |        |     |
|           | IAA  | 0.710<br>**  | 0.651<br>**  | 0.714<br>** | 1            |             |        |        |        |     |
|           | IPYA | 0.930<br>*** | 0.465        | 0.713<br>** | 0.612<br>*   | 1           |        |        |        |     |
|           | Put  | 0.238        | 0.484        | 0.473       | 0.221        | 0.043       | 1      |        |        |     |
|           | Spd  | -0.472       | -0.013       | -0.387      | 0.041        | -0.538<br>* | -0.083 | 1      |        |     |
|           | Spm  | 0.269        | 0.516<br>*   | 0.452       | 0.743<br>*** | 0.152       | 0.029  | 0.349  | 1      |     |
|           | ACC  | -0.114       | -0.132       | -0.118      | -0.391       | -0.066      | -0.245 | -0.310 | -0.323 | 1   |

**Table S10.** Pearson correlation coefficient ( $n=8$ ) of 18 variables, including actinobacterial auxins, polyamines and 1-aminocyclopropane-1-carboxylic deaminase, six agronomic traits and six plant growth regulators obtained from shoots of *S. bigelovii*. Seedlings were seed- and soil-inoculated with *S. chartreusis*, *S. tritolerans* and *S. rochei* (*Sc/St/Sr*) grown in an evaporative-cooled greenhouse and maintained at  $25\pm 2^\circ\text{C}$  (\*,  $P<0.05$ , \*\*,  $P<0.01$  and \*\*\*,  $P<0.001$ ).

| Parameter       | <i>Sc/St/Sr</i> |               |               |               |               |               | Shoot         |               |               |               |               |               |               |               |             |               |               |               |   |  |
|-----------------|-----------------|---------------|---------------|---------------|---------------|---------------|---------------|---------------|---------------|---------------|---------------|---------------|---------------|---------------|-------------|---------------|---------------|---------------|---|--|
|                 | IAA             | IPYA          | Put           | Spd           | Spm           | ACCD          | L             | DW            | SDW           | Chla          | Chlb          | Car           | IAA           | IPYA          | Put         | Spd           | Spm           | ACC           |   |  |
| <i>Sc/St/Sr</i> | IAA             | 1             |               |               |               |               |               |               |               |               |               |               |               |               |             |               |               |               |   |  |
|                 | IPYA            | 0.995<br>***  | 1             |               |               |               |               |               |               |               |               |               |               |               |             |               |               |               |   |  |
|                 | Put             | 0.955<br>***  | 0.962<br>***  | 1             |               |               |               |               |               |               |               |               |               |               |             |               |               |               |   |  |
|                 | Spd             | 0.948<br>***  | 0.950<br>***  | 0.975<br>***  | 1             |               |               |               |               |               |               |               |               |               |             |               |               |               |   |  |
|                 | Spm             | 0.907<br>***  | 0.898<br>***  | 0.944<br>***  | 0.907<br>***  | 1             |               |               |               |               |               |               |               |               |             |               |               |               |   |  |
|                 | ACCD            | 0.949<br>***  | 0.952<br>***  | 0.998<br>***  | 0.979<br>***  | 0.945<br>***  | 1             |               |               |               |               |               |               |               |             |               |               |               |   |  |
| Shoot           | L               | 0.923<br>***  | 0.934<br>***  | 0.971<br>***  | 0.937<br>***  | 0.951<br>***  | 0.970<br>***  | 1             |               |               |               |               |               |               |             |               |               |               |   |  |
|                 | DW              | 0.949<br>***  | 0.947<br>***  | 0.978<br>***  | 0.952<br>***  | 0.971<br>***  | 0.978<br>***  | 0.981<br>***  | 1             |               |               |               |               |               |             |               |               |               |   |  |
|                 | SDW             | 0.957<br>***  | 0.939<br>***  | 0.957<br>***  | 0.942<br>***  | 0.952<br>***  | 0.963<br>***  | 0.940<br>***  | 0.975<br>***  | 1             |               |               |               |               |             |               |               |               |   |  |
|                 | Chla            | 0.891<br>***  | 0.904<br>***  | 0.935<br>***  | 0.928<br>***  | 0.908<br>***  | 0.934<br>***  | 0.912<br>***  | 0.933<br>***  | 0.893<br>***  | 1             |               |               |               |             |               |               |               |   |  |
|                 | Chlb            | 0.964<br>***  | 0.957<br>***  | 0.973<br>***  | 0.970<br>***  | 0.962<br>***  | 0.976<br>***  | 0.959<br>***  | 0.975<br>***  | 0.976<br>***  | 0.916<br>***  | 1             |               |               |             |               |               |               |   |  |
|                 | Car             | 0.920<br>***  | 0.911<br>***  | 0.969<br>***  | 0.944<br>***  | 0.982<br>***  | 0.973<br>***  | 0.953<br>***  | 0.978<br>***  | 0.964<br>***  | 0.917<br>***  | 0.974<br>***  | 1             |               |             |               |               |               |   |  |
|                 | IAA             | 0.857<br>***  | 0.864<br>***  | 0.948<br>***  | 0.944<br>***  | 0.913<br>***  | 0.954<br>***  | 0.912<br>***  | 0.916<br>***  | 0.899<br>***  | 0.930<br>***  | 0.918<br>***  | 0.943<br>***  | 1             |             |               |               |               |   |  |
|                 | IPYA            | 0.607         | 0.599         | 0.684<br>**   | 0.595         | 0.691<br>**   | 0.666<br>**   | 0.636<br>**   | 0.671<br>**   | 0.638<br>**   | 0.555<br>*    | 0.634<br>**   | 0.695<br>**   | 0.615<br>*    | 1           |               |               |               |   |  |
|                 | Put             | 0.946<br>***  | 0.961<br>***  | 0.980<br>***  | 0.975<br>***  | 0.912<br>***  | 0.977<br>***  | 0.958<br>***  | 0.957<br>***  | 0.917<br>***  | 0.950<br>***  | 0.950<br>***  | 0.932<br>***  | 0.934<br>***  | 0.629<br>** | 1             |               |               |   |  |
|                 | Spd             | 0.925<br>***  | 0.921<br>***  | 0.978<br>***  | 0.960<br>***  | 0.921<br>***  | 0.982<br>***  | 0.958<br>***  | 0.963<br>***  | 0.948<br>***  | 0.897<br>***  | 0.954<br>***  | 0.962<br>***  | 0.935<br>***  | 0.673<br>** | 0.955<br>***  | 1             |               |   |  |
|                 | Spm             | 0.934<br>***  | 0.935<br>***  | 0.943<br>***  | 0.955<br>***  | 0.904<br>***  | 0.939<br>***  | 0.892<br>***  | 0.919<br>***  | 0.890<br>***  | 0.918<br>***  | 0.936<br>***  | 0.936<br>***  | 0.917<br>***  | 0.622<br>*  | 0.956<br>***  | 0.920<br>***  | 1             |   |  |
|                 | ACC             | -0.824<br>*** | -0.852<br>*** | -0.913<br>*** | -0.898<br>*** | -0.770<br>*** | -0.906<br>*** | -0.836<br>*** | -0.823<br>*** | -0.785<br>*** | -0.857<br>*** | -0.829<br>*** | -0.834<br>*** | -0.904<br>*** | -0.600<br>* | -0.905<br>*** | -0.889<br>*** | -0.879<br>*** | 1 |  |



**Table S11.** Pearson correlation coefficient ( $n=8$ ) of 14 variables, including actinobacterial auxins, polyamines and 1-aminocyclopropane-1-carboxylic deaminase, two agronomic traits and six plant growth regulators obtained from roots of *S. bigelovii*. Seedlings were seed- and soil-inoculated with *S. chartreusis*, *S. tritolerans* and *S. rochei* (*Sc/St/Sr*) grown in an evaporative-cooled greenhouse and maintained at  $25\pm 2^\circ\text{C}$  (\*,  $P<0.05$ , \*\*,  $P<0.01$  and \*\*\*,  $P<0.001$ ).

| Parameter       |      | <i>Sc/St/Sr</i> |               |               |               |               |               | Root          |               |               |               |               |               |               |     |  |  |
|-----------------|------|-----------------|---------------|---------------|---------------|---------------|---------------|---------------|---------------|---------------|---------------|---------------|---------------|---------------|-----|--|--|
|                 |      | IAA             | IPYA          | Put           | Spd           | Spm           | ACCD          | L             | DW            | IAA           | IPYA          | Put           | Spd           | Spm           | ACC |  |  |
| <i>Sc/St/Sr</i> | IAA  | 1               |               |               |               |               |               |               |               |               |               |               |               |               |     |  |  |
|                 | IPYA | 0.995<br>***    | 1             |               |               |               |               |               |               |               |               |               |               |               |     |  |  |
|                 | Put  | 0.955<br>***    | 0.962<br>***  | 1             |               |               |               |               |               |               |               |               |               |               |     |  |  |
|                 | Spd  | 0.948<br>***    | 0.950<br>***  | 0.975<br>***  | 1             |               |               |               |               |               |               |               |               |               |     |  |  |
|                 | Spm  | 0.907<br>***    | 0.898<br>***  | 0.944<br>***  | 0.907<br>***  | 1             |               |               |               |               |               |               |               |               |     |  |  |
|                 | ACCD | 0.949<br>***    | 0.952<br>***  | 0.998<br>***  | 0.979<br>***  | 0.945<br>***  | 1             |               |               |               |               |               |               |               |     |  |  |
| Root            | L    | 0.929<br>***    | 0.932<br>***  | 0.973<br>***  | 0.962<br>***  | 0.954<br>***  | 0.976<br>***  | 1             |               |               |               |               |               |               |     |  |  |
|                 | DW   | 0.962<br>***    | 0.970<br>***  | 0.979<br>***  | 0.968<br>***  | 0.957<br>***  | 0.975<br>***  | 0.960<br>***  | 1             |               |               |               |               |               |     |  |  |
|                 | IAA  | 0.891<br>***    | 0.913<br>***  | 0.943<br>***  | 0.943<br>***  | 0.852<br>***  | 0.943<br>***  | 0.897<br>***  | 0.947<br>***  | 1             |               |               |               |               |     |  |  |
|                 | IPYA | 0.779<br>***    | 0.799<br>***  | 0.800<br>***  | 0.837<br>***  | 0.664<br>**   | 0.787<br>***  | 0.728<br>**   | 0.799<br>***  | 0.781<br>***  | 1             |               |               |               |     |  |  |
|                 | Put  | 0.918<br>***    | 0.927<br>***  | 0.975<br>***  | 0.948<br>***  | 0.959<br>***  | 0.974<br>***  | 0.982<br>***  | 0.968<br>***  | 0.901<br>***  | 0.757<br>***  | 1             |               |               |     |  |  |
|                 | Spd  | 0.944<br>***    | 0.957<br>***  | 0.961<br>***  | 0.970<br>***  | 0.915<br>***  | 0.958<br>***  | 0.972<br>***  | 0.968<br>***  | 0.915<br>***  | 0.789<br>***  | 0.962<br>***  | 1             |               |     |  |  |
|                 | Spm  | 0.917<br>***    | 0.909<br>***  | 0.946<br>***  | 0.908<br>***  | 0.887<br>***  | 0.944<br>***  | 0.895<br>***  | 0.908<br>***  | 0.899<br>***  | 0.713<br>**   | 0.873<br>***  | 0.864<br>***  | 1             |     |  |  |
|                 | ACC  | -0.928<br>***   | -0.930<br>*** | -0.967<br>*** | -0.978<br>*** | -0.905<br>*** | -0.974<br>*** | -0.948<br>*** | -0.956<br>*** | -0.939<br>*** | -0.801<br>*** | -0.941<br>*** | -0.950<br>*** | -0.905<br>*** | 1   |  |  |
